# Supplementary material for: Human RELA haploinsufficiency results in autosomal-dominant chronic mucocutaneous ulceration
Source: PubMed Central journal article supplement — J Exp Med. 2017 Jul 3;214(7):1937–47. doi: 10.1084/jem.20160724 (PMC5502421; doi:10.1084/jem.20160724), 2017-07-03
Supplement: JEM_20160724_sm.pdf [file JEM_20160724_sm.pdf]

SUPPLEMENTAL MATERIAL

Badran et al., <https://doi.org/10.1084/jem.20160724>

Table S1. Hemogram, inflammatory markers, and autoantibodies in the proband at 5 yr of age

| Clinical status                                                       | Mildly symptomatic | Disease flare      | Remission     | Reference range <sup>a,b</sup> |
|-----------------------------------------------------------------------|--------------------|--------------------|---------------|--------------------------------|
| Therapy, dose, (mg/kg)                                                | Prednisolone, 0.3  | Prednisolone, 0.19 | Infliximab, 5 |                                |
| <b>Hemogram</b>                                                       |                    |                    |               |                                |
| Hemoglobin (g/dl)                                                     | 11.5               | 10.9               | 11.1          | 11.1–12.9                      |
| WBCs (10 <sup>3</sup> cells/ $\mu$ l)                                 | 8.35               | 22.3               | 9.5           | 6.0–10.8                       |
| Neutrophils (10 <sup>3</sup> cells/ $\mu$ l)                          | 5.97               | 18.4               | 5.5           | 2.3–6.4                        |
| Lymphocytes (10 <sup>3</sup> cells/ $\mu$ l)                          | 1.98               | 3.2                | 3.4           | 1.5–3.8                        |
| Monocytes (10 <sup>3</sup> cells/ $\mu$ l)                            | 0.43               | 0.67               | 0.48          | 0.5–1.1                        |
| Platelets (10 <sup>3</sup> cells/ $\mu$ l)                            | 270                | 260                | 238           | 190–365                        |
| <b>Inflammatory markers</b>                                           |                    |                    |               |                                |
| CRP (mg/dl)                                                           | 1.80               | 13.84              | 0.09          | <0.50                          |
| ESR (mm/h)                                                            | 28                 | 37                 | 12            | 0–20                           |
| <b>Autoantibodies</b>                                                 |                    |                    |               |                                |
| Antinuclear antibody                                                  | Negative           | -                  | -             | Negative                       |
| Ribonucleic protein IgG (AU/ml)                                       | 0                  | -                  | -             | <40                            |
| Scleroderma-70 IgG (AU/ml)                                            | 0                  | -                  | -             | <40                            |
| Smith, ENA IgG (AU/ml)                                                | 0                  | -                  | -             | <40                            |
| SSA/RO, ENA IgG (AU/ml)                                               | 39                 | -                  | -             | <40                            |
| SSB/LA, ENA IgG (mg/dL)                                               | 0                  | -                  | -             | <40                            |
| <b>Lymphocyte subsets</b>                                             |                    |                    |               |                                |
| CD3 <sup>+</sup> (10 <sup>3</sup> cells/ $\mu$ l)                     |                    |                    | 3.6           | 1.4–3.7                        |
| CD3 <sup>+</sup> CD4 <sup>+</sup> (10 <sup>3</sup> cells/ $\mu$ l)    |                    |                    | 2.6           | 0.7–2.2                        |
| CD3 <sup>+</sup> CD8 <sup>+</sup> (10 <sup>3</sup> cells/ $\mu$ l)    |                    |                    | 0.82          | 0.49–1.3                       |
| CD19 <sup>+</sup> (10 <sup>3</sup> cells/ $\mu$ l)                    |                    |                    | 0.67          | 0.39–1.4                       |
| CD16 <sup>+</sup> /CD56 <sup>+</sup> (10 <sup>3</sup> cells/ $\mu$ l) |                    |                    | 0.30          | 0.13–0.72                      |
| <b>Immunoglobulins</b>                                                |                    |                    |               |                                |
| IgG (mg/dl)                                                           |                    |                    | 628           | 441–1,135                      |
| IgA (mg/dl)                                                           |                    |                    | 133           | 22–159                         |
| IgM (mg/dl)                                                           |                    |                    | 102           | 47–200                         |
| IgE (mg/dl)                                                           |                    |                    | 2             | 0–200                          |
| <b>Vaccine titers</b>                                                 |                    |                    |               |                                |
| Pneumococcal IgG (number of positive subtypes)                        |                    |                    | 7/14          | $\geq$ 7/14                    |
| Tetanus IgG (IU/ml)                                                   |                    |                    | 2.25          | >0.15                          |
| Polysaccharide ribose phosphate (ng/ml)                               |                    |                    | 9,000         | >1,000                         |
| <b>Lymphocyte proliferation (cpm)</b>                                 |                    |                    |               |                                |
| PHA                                                                   |                    |                    | 338,981       | 104,415–319,780                |
| Anti-CD3                                                              |                    |                    | 120,069       | 78,423–205,485                 |
| Concanavalin A                                                        |                    |                    | 214,659       | 74,586–194,337                 |
| Mitogen background                                                    |                    |                    | 707           | 321–2,510                      |
| <i>Candida albicans</i>                                               |                    |                    | 30,053        | 20,561–189,605                 |
| Tetanus toxoid                                                        |                    |                    | 46,584        | 14,938–96,819                  |
| Antigen background                                                    |                    |                    | 4,157         | 724–7,752                      |

<sup>a</sup>The reference range for the hemogram and inflammatory markers established by Boston Children's Hospital, where the test was performed.

<sup>b</sup>The reference range for autoantibodies established by ARUP Laboratories, University of Utah, where the test was performed.

Table S2. Heterozygous mutations shared between P1 and P2 identified by WES and not found in the Exome Aggregation Consortium database, the dbSNP database, 1000 Genomes database, or in our in-house collection of 80 exomes

| Chr          | Position        | Strand | Reference | P1 and P2 | Gene           |
|--------------|-----------------|--------|-----------|-----------|----------------|
| chr01        | 47182041        | -      | C         | T         | <i>EFCAB14</i> |
| chr01        | 55058271        | +      | A         | C         | <i>ACOT11</i>  |
| chr01        | 183212295       | +      | T         | G         | <i>LAMC2</i>   |
| chr03        | 149498079       | -      | G         | A         | <i>ANKUB1</i>  |
| chr06        | 137525482       | -      | T         | C         | <i>IFNGR1</i>  |
| <b>chr11</b> | <b>65427136</b> | -      | <b>G</b>  | <b>A</b>  | <i>RELA</i>    |
| chr19        | 7688733         | -      | G         | A         | <i>XAB2</i>    |

Nucleotides from the coding DNA strand are listed. The patients' mutation in *RELA* is bolded.

Table S3. Characterization of the cellular infiltrate in the skin of WT and *Rela*<sup>+/-</sup> mice after s.c. injection of TNF-α

| Cell type                | Staining marker                          | Number of cells (10 <sup>3</sup> /cm <sup>2</sup> ) |                            |             |                            |
|--------------------------|------------------------------------------|-----------------------------------------------------|----------------------------|-------------|----------------------------|
|                          |                                          | Saline                                              |                            | TNF         |                            |
|                          |                                          | WT                                                  | <i>Rela</i> <sup>+/-</sup> | WT          | <i>Rela</i> <sup>+/-</sup> |
| <b>Dermis</b>            |                                          |                                                     |                            |             |                            |
| Neutrophils              | CD11b <sup>+</sup> GR1 <sup>high</sup>   | 6.87 ± 3.30                                         | 2.70 ± 0.07                | 2.94 ± 0.62 | 29.69 ± 7.70*              |
| Macrophages              | CD11b <sup>+</sup> F4/80 <sup>+</sup>    | 5.14 ± 3.02                                         | 2.72 ± 0.50                | 4.69 ± 1.74 | 11.72 ± 1.72*              |
| DCs                      | CD11c <sup>+</sup> MHCII <sup>high</sup> | 9.10 ± 2.69                                         | 6.48 ± 0.93                | 2.82 ± 0.29 | 2.24 ± 0.53                |
| CD4 <sup>+</sup> T cells | CD3 <sup>+</sup> CD4 <sup>+</sup>        | 0.17 ± 0.03                                         | 0.13 ± 0.03                | 0.10 ± 0.01 | 0.11 ± 0.04                |
| CD8 <sup>+</sup> T cells | CD3 <sup>+</sup> CD8 <sup>+</sup>        | 0.46 ± 0.16                                         | 2.07 ± 1.55                | 0.38 ± 0.20 | 0.48 ± 0.15                |
| <b>Hypodermis</b>        |                                          |                                                     |                            |             |                            |
| Neutrophils              | CD11b <sup>+</sup> GR1 <sup>high</sup>   | 12.99 ± 9.17                                        | 4.06 ± 1.10                | 4.97 ± 1.69 | 1,039.00 ± 634.12          |
| Macrophages              | CD11b <sup>+</sup> F4/80 <sup>+</sup>    | 7.53 ± 2.75                                         | 5.43 ± 1.36                | 8.44 ± 0.89 | 188.36 ± 10.21****         |
| DCs                      | CD11c <sup>+</sup> MHCII <sup>high</sup> | 14.74 ± 7.78                                        | 6.14 ± 0.97                | 1.86 ± 0.36 | 18.22 ± 2.00**             |
| CD4 <sup>+</sup> T cells | CD3 <sup>+</sup> CD4 <sup>+</sup>        | 0.04 ± 0.01                                         | 0.03 ± 0.02                | 0.02 ± 0.01 | 0.19 ± 0.04*               |
| CD8 <sup>+</sup> T cells | CD3 <sup>+</sup> CD8 <sup>+</sup>        | 1.06 ± 0.07                                         | 0.67 ± 0.61                | 0.26 ± 0.05 | 2.28 ± 0.61*               |

Data are means ± SEM. Asterisks indicate a significant difference between *Rela*<sup>+/-</sup> and WT mice treated with s.c. TNF. \*, P < 0.05; \*\*, P < 0.01, \*\*\*\*, P < 0.0001, Student's t test. Data are pooled from two independent experiments, each having three 6–8-wk-old mice of each genotype.
